# Supplementary material for: First Report of an Extensively Drug-Resistant ST23 Klebsiella pneumoniae of Capsular Serotype K1 Co-Producing CTX-M-15, OXA-48 and ArmA in Spain
Source: MDPI journal article supplement (doi:10.3390/antibiotics10020157), 2021-02-04
Supplement: s1 [file s1]

| Gene      | Gaps | Coverage | Identity | Accession    |
|-----------|------|----------|----------|--------------|
| acrA      | 0/0  | 100.0    | 100.0    | YP_002918166 |
| acrB      | 0/0  | 100.0    | 100.0    | YP_002918165 |
| allA      | 0/0  | 100.0    | 100.0    | YP_002918200 |
| allB      | 0/0  | 100.0    | 100.0    | YP_002918207 |
| allC      | 0/0  | 100.0    | 99.9     | YP_002918211 |
| allD      | 0/0  | 100.0    | 100.0    | YP_002918212 |
| allR      | 0/0  | 100.0    | 100.0    | YP_002918201 |
| allS      | 0/0  | 100.0    | 100.0    | YP_002918199 |
| clbA      | 0/0  | 100.0    | 100.0    | YP_006635473 |
| clbB      | 0/0  | 100.0    | 100.0    | YP_006635474 |
| clbC      | 0/0  | 100.0    | 100.0    | YP_006635475 |
| clbD      | 0/0  | 100.0    | 100.0    | YP_006635476 |
| clbE      | 0/0  | 100.0    | 99.6     | YP_006635477 |
| clbF      | 0/0  | 100.0    | 100.0    | YP_006635478 |
| clbG      | 0/0  | 100.0    | 100.0    | YP_006635479 |
| clbH      | 0/0  | 100.0    | 100.0    | YP_006635480 |
| clbI      | 0/0  | 100.0    | 100.0    | YP_006635481 |
| clbL      | 0/0  | 100.0    | 100.0    | YP_006635484 |
| clbM      | 0/0  | 100.0    | 99.9     | YP_006635485 |
| clbN      | 0/0  | 100.0    | 100.0    | YP_006635486 |
| clbO      | 0/0  | 100.0    | 100.0    | YP_006635487 |
| clbP      | 0/0  | 100.0    | 100.0    | YP_006635488 |
| clbQ      | 0/0  | 100.0    | 100.0    | YP_006635489 |
| clbS      | 0/0  | 100.0    | 100.0    | YP_006635490 |
| clpV/tssH | 0/0  | 100.0    | 99.0     | YP_005226603 |
| cpsACP    | 0/0  | 100.0    | 100.0    | YP_002920368 |
| dotU/tssL | 0/0  | 100.0    | 99.7     | YP_005226600 |
| entA      | 0/0  | 100.0    | 100.0    | YP_002918380 |
| entB      | 0/0  | 100.0    | 100.0    | YP_002918379 |
| entC      | 0/0  | 100.0    | 100.0    | YP_002918377 |
| entD      | 0/0  | 100.0    | 100.0    | YP_002918366 |
| entE      | 0/0  | 100.0    | 100.0    | YP_002918378 |
| entF      | 0/0  | 100.0    | 100.0    | YP_002918370 |
| fepA      | 0/0  | 100.0    | 100.0    | YP_002918367 |
| fepB      | 0/0  | 100.0    | 100.0    | YP_002918376 |
| fepC      | 0/0  | 100.0    | 100.0    | YP_002918371 |
| fepD      | 0/0  | 100.0    | 100.0    | YP_002918373 |
| fepG      | 0/0  | 100.0    | 100.0    | YP_002918372 |
| fes       | 0/0  | 100.0    | 99.9     | YP_002918368 |
| fimA      | 0/0  | 100.0    | 100.0    | YP_002921137 |
| fimB      | 0/0  | 100.0    | 100.0    | YP_002921134 |
| fimC      | 0/0  | 100.0    | 100.0    | YP_002921139 |
| fimD      | 0/0  | 100.0    | 100.0    | YP_002921140 |

|             |      |       |       |              |
|-------------|------|-------|-------|--------------|
| fimE        | 0/0  | 100.0 | 100.0 | YP_002921135 |
| fimF        | 0/0  | 100.0 | 100.0 | YP_002921141 |
| fimG        | 0/0  | 100.0 | 100.0 | YP_002921142 |
| fimH        | 0/0  | 100.0 | 100.0 | YP_002921143 |
| fimI        | 0/0  | 100.0 | 100.0 | YP_002921138 |
| fimK        | 0/0  | 100.0 | 100.0 | YP_002921144 |
| fyuA        | 0/0  | 100.0 | 100.0 | NP_405467    |
| galF        | 0/0  | 100.0 | 100.0 | YP_002920369 |
| glf         | 0/0  | 100.0 | 99.9  | YP_002920345 |
| gmd         | 0/0  | 100.0 | 100.0 | YP_002920358 |
| gnd         | 0/0  | 100.0 | 99.9  | YP_002920353 |
| hcp/tssD    | 0/0  | 100.0 | 99.4  | YP_005226602 |
| icmF/tssM   | 0/0  | 90.0  | 97.0  | YP_005226614 |
| iroD        | 0/0  | 100.0 | 99.0  | YP_002920269 |
| iroE        | 0/0  | 100.0 | 100.0 | YP_002919453 |
| iroN        | 0/0  | 98.9  | 94.3  | YP_002920266 |
| irp1        | 0/0  | 100.0 | 99.0  | NP_405471    |
| irp2        | 0/0  | 100.0 | 99.4  | NP_405472    |
| iucA        | 0/0  | 100.0 | 100.0 | YP_001688094 |
| iucB        | 0/0  | 100.0 | 100.0 | YP_001688093 |
| iucC        | 0/0  | 100.0 | 100.0 | YP_001688092 |
| iucD        | 0/0  | 100.0 | 100.0 | YP_001688091 |
| iutA        | 0/0  | 100.0 | 100.0 | YP_001688090 |
| kfoC        | 0/0  | 93.5  | 100.0 | YP_002920342 |
| magA/wzy_K1 | 0/0  | 100.0 | 100.0 | YP_002920361 |
| manB        | 0/0  | 100.0 | 100.0 | YP_002920351 |
| manC        | 0/0  | 100.0 | 100.0 | YP_002920352 |
| mrkA        | 0/0  | 100.0 | 100.0 | YP_002921128 |
| mrkB        | 0/0  | 100.0 | 100.0 | YP_002921127 |
| mrkC        | 0/0  | 100.0 | 100.0 | YP_002921126 |
| mrkD        | 0/0  | 100.0 | 100.0 | YP_002921125 |
| mrkF        | 0/0  | 100.0 | 100.0 | YP_002921124 |
| mrkH        | 0/0  | 100.0 | 100.0 | YP_002921121 |
| mrkI        | 0/0  | 100.0 | 99.8  | YP_002921122 |
| mrkJ        | 0/0  | 100.0 | 100.0 | YP_002921123 |
| rcsA        | 0/0  | 100.0 | 100.0 | YP_002920216 |
| rcsB        | 0/0  | 100.0 | 100.0 | YP_002920501 |
| rmpA        | 1-1月 | 99.8  | 91.3  | YP_001687850 |
| sciN/tssJ   | 0/0  | 100.0 | 100.0 | YP_005226619 |
| tssF        | 0/0  | 100.0 | 99.6  | YP_005226617 |
| tssG        | 0/0  | 100.0 | 99.7  | YP_005226618 |
| ugd         | 0/0  | 100.0 | 100.0 | YP_002920350 |
| vasE/tssK   | 0/0  | 100.0 | 99.3  | YP_005226599 |
| vipA/tssB   | 0/0  | 100.0 | 99.8  | YP_005226597 |

|           |     |       |       |              |
|-----------|-----|-------|-------|--------------|
| vipA/tssB | 0/0 | 100.0 | 93.3  | YP_005226597 |
| vipB/tssC | 0/0 | 100.0 | 98.8  | YP_005226598 |
| wbbM      | 0/0 | 100.0 | 100.0 | YP_002920346 |
| wbbN      | 0/0 | 100.0 | 100.0 | YP_002920344 |
| wbbO      | 0/0 | 100.0 | 100.0 | YP_002920343 |
| wcaG      | 0/0 | 100.0 | 99.9  | YP_002920357 |
| wcaH      | 0/0 | 100.0 | 100.0 | YP_002920356 |
| wcaI      | 0/0 | 100.0 | 100.0 | YP_002920355 |
| wcaJ      | 0/0 | 100.0 | 99.9  | YP_002920354 |
| wcsT      | 0/0 | 100.0 | 100.0 | YP_002920359 |
| wza       | 0/0 | 100.0 | 100.0 | YP_002920366 |
| wzb       | 0/0 | 100.0 | 100.0 | YP_002920365 |
| wzc       | 0/0 | 100.0 | 100.0 | YP_002920364 |
| wzi       | 0/0 | 100.0 | 100.0 | YP_002920367 |
| wzm       | 0/0 | 100.0 | 100.0 | YP_002920348 |
| wzt       | 0/0 | 100.0 | 100.0 | YP_002920347 |
| wzx       | 0/0 | 100.0 | 99.9  | YP_002920363 |
| yagZ/ecpA | 0/0 | 99.3  | 90.1  | NP_286010    |
| ybdA      | 0/0 | 100.0 | 100.0 | YP_002918375 |
| ybtA      | 0/0 | 100.0 | 99.1  | NP_405473    |
| ybtE      | 0/0 | 100.0 | 99.6  | NP_405468    |
| ybtP      | 0/0 | 100.0 | 98.5  | YP_002920246 |
| ybtQ      | 0/0 | 100.0 | 98.1  | YP_002920245 |
| ybtS      | 0/0 | 100.0 | 98.5  | NP_405477    |
| ybtT      | 0/0 | 100.0 | 99.6  | NP_405469    |
| ybtU      | 0/0 | 100.0 | 99.4  | YP_002920250 |
| ybtX      | 0/0 | 100.0 | 98.7  | YP_002920244 |

## Product

|                                                                                                                                                                |
|----------------------------------------------------------------------------------------------------------------------------------------------------------------|
| (acrA) acriflavine resistance protein A [AcrAB (VF0568)] [Klebsiella pneumoniae subsp. pneumoniae NTUH-K2044]                                                  |
| (acrB) acriflavine resistance protein B [AcrAB (VF0568)] [Klebsiella pneumoniae subsp. pneumoniae NTUH-K2044]                                                  |
| (allA) ureidoglycolate hydrolase [Allantion utilization (VF0572)] [Klebsiella pneumoniae subsp. pneumoniae NTUH-K2044]                                         |
| (allB) allantoinase [Allantion utilization (VF0572)] [Klebsiella pneumoniae subsp. pneumoniae NTUH-K2044]                                                      |
| (allC) allantoate amidohydrolase [Allantion utilization (VF0572)] [Klebsiella pneumoniae subsp. pneumoniae NTUH-K2044]                                         |
| (allD) ureidoglycolate dehydrogenase [Allantion utilization (VF0572)] [Klebsiella pneumoniae subsp. pneumoniae NTUH-K2044]                                     |
| (allR) DNA-binding transcriptional repressor AllR [Allantion utilization (VF0572)] [Klebsiella pneumoniae subsp. pneumoniae NTUH-K2044]                        |
| (allS) DNA-binding transcriptional activator AllS [Allantion utilization (VF0572)] [Klebsiella pneumoniae subsp. pneumoniae NTUH-K2044]                        |
| (clbA) colibactin biosynthesis phosphopantetheinyl transferase ClbA [Colibactin (VF0573)] [Klebsiella pneumoniae subsp. pneumoniae 1084]                       |
| (clbB) colibactin hybrid non-ribosomal peptide synthetase/type I polyketide synthase ClbB [Colibactin (VF0573)] [Klebsiella pneumoniae subsp. pneumoniae 1084] |
| (clbC) colibactin polyketide synthase ClbC [Colibactin (VF0573)] [Klebsiella pneumoniae subsp. pneumoniae 1084]                                                |
| (clbD) colibactin biosynthesis dehydrogenase ClbD [Colibactin (VF0573)] [Klebsiella pneumoniae subsp. pneumoniae 1084]                                         |
| (clbE) colibactin biosynthesis aminomalonyl-acyl carrier protein ClbE [Colibactin (VF0573)] [Klebsiella pneumoniae subsp. pneumoniae 1084]                     |
| (clbF) colibactin biosynthesis dehydrogenase ClbF [Colibactin (VF0573)] [Klebsiella pneumoniae subsp. pneumoniae 1084]                                         |
| (clbG) colibactin biosynthesis acyltransferase ClbG [Colibactin (VF0573)] [Klebsiella pneumoniae subsp. pneumoniae 1084]                                       |
| (clbH) colibactin non-ribosomal peptide synthetase ClbH [Colibactin (VF0573)] [Klebsiella pneumoniae subsp. pneumoniae 1084]                                   |
| (clbI) colibactin polyketide synthase ClbI [Colibactin (VF0573)] [Klebsiella pneumoniae subsp. pneumoniae 1084]                                                |
| (clbL) colibactin biosynthesis amidase ClbL [Colibactin (VF0573)] [Klebsiella pneumoniae subsp. pneumoniae 1084]                                               |
| (clbM) precolibactin export MATE transporter ClbM [Colibactin (VF0573)] [Klebsiella pneumoniae subsp. pneumoniae 1084]                                         |
| (clbN) colibactin non-ribosomal peptide synthetase ClbN [Colibactin (VF0573)] [Klebsiella pneumoniae subsp. pneumoniae 1084]                                   |
| (clbO) colibactin polyketide synthase ClbO [Colibactin (VF0573)] [Klebsiella pneumoniae subsp. pneumoniae 1084]                                                |
| (clbP) precolibactin peptidase ClbP [Colibactin (VF0573)] [Klebsiella pneumoniae subsp. pneumoniae 1084]                                                       |
| (clbQ) colibactin biosynthesis thioesterase ClbQ [Colibactin (VF0573)] [Klebsiella pneumoniae subsp. pneumoniae 1084]                                          |
| (clbS) colibactin self-protection protein ClbS [Colibactin (VF0573)] [Klebsiella pneumoniae subsp. pneumoniae 1084]                                            |
| (clpV/tssH) type VI secretion system ATPase TssH [T6SS (VF0569)] [Klebsiella pneumoniae subsp. pneumoniae HS11286]                                             |
| (cpsACP) phosphatase PAP2 family protein [Capsule (VF0560)] [Klebsiella pneumoniae subsp. pneumoniae NTUH-K2044]                                               |
| (dotU/tssL) type VI secretion system protein DotU/TssL family [T6SS (VF0569)] [Klebsiella pneumoniae subsp. pneumoniae HS11286]                                |
| (entA) 23-dihydroxybenzoate-23-dehydrogenase [Ent (VF0562)] [Klebsiella pneumoniae subsp. pneumoniae NTUH-K2044]                                               |
| (entB) 23-dihydro-23-dihydroxybenzoate synthetase isochromatase [Ent (VF0562)] [Klebsiella pneumoniae subsp. pneumoniae NTUH-K2044]                            |
| (entC) isochorismate synthase [Ent (VF0562)] [Klebsiella pneumoniae subsp. pneumoniae NTUH-K2044]                                                              |
| (entD) enterochelin synthetase component D [Ent (VF0562)] [Klebsiella pneumoniae subsp. pneumoniae NTUH-K2044]                                                 |
| (entE) enterobactin synthase subunit E [Ent (VF0562)] [Klebsiella pneumoniae subsp. pneumoniae NTUH-K2044]                                                     |
| (entF) enterobactin synthase subunit F [Ent (VF0562)] [Klebsiella pneumoniae subsp. pneumoniae NTUH-K2044]                                                     |
| (fepA) outer membrane receptor FepA [Ent (VF0562)] [Klebsiella pneumoniae subsp. pneumoniae NTUH-K2044]                                                        |
| (fepB) iron-enterobactin transporter periplasmic binding protein [Ent (VF0562)] [Klebsiella pneumoniae subsp. pneumoniae NTUH-K2044]                           |
| (fepC) iron-enterobactin transporter ATP-binding protein [Ent (VF0562)] [Klebsiella pneumoniae subsp. pneumoniae NTUH-K2044]                                   |
| (fepD) iron-enterobactin transporter membrane protein [Ent (VF0562)] [Klebsiella pneumoniae subsp. pneumoniae NTUH-K2044]                                      |
| (fepG) iron-enterobactin transporter permease [Ent (VF0562)] [Klebsiella pneumoniae subsp. pneumoniae NTUH-K2044]                                              |
| (fes) enterobactin/ferric enterobactin esterase [Ent (VF0562)] [Klebsiella pneumoniae subsp. pneumoniae NTUH-K2044]                                            |
| (fimA) type 1 major fimbrial subunit precursor [Type I fimbriae (VF0566)] [Klebsiella pneumoniae subsp. pneumoniae NTUH-K2044]                                 |
| (fimB) tyrosine recombinase [Type I fimbriae (VF0566)] [Klebsiella pneumoniae subsp. pneumoniae NTUH-K2044]                                                    |
| (fimC) periplasmic chaperone [Type I fimbriae (VF0566)] [Klebsiella pneumoniae subsp. pneumoniae NTUH-K2044]                                                   |
| (fimD) outer membrane usher protein [Type I fimbriae (VF0566)] [Klebsiella pneumoniae subsp. pneumoniae NTUH-K2044]                                            |

(fimE) tyrosine recombinase [Type I fimbriae (VF0566)] [Klebsiella pneumoniae subsp. pneumoniae NTUH-K2044]

(fimF) type 1 fimbrial minor component [Type I fimbriae (VF0566)] [Klebsiella pneumoniae subsp. pneumoniae NTUH-K2044]

(fimG) type 1 fimbrial minor component [Type I fimbriae (VF0566)] [Klebsiella pneumoniae subsp. pneumoniae NTUH-K2044]

(fimH) type 1 fimbrial adhesin precursor [Type I fimbriae (VF0566)] [Klebsiella pneumoniae subsp. pneumoniae NTUH-K2044]

(fimI) type 1 pilus biosynthesis fimbrial protein [Type I fimbriae (VF0566)] [Klebsiella pneumoniae subsp. pneumoniae NTUH-K2044]

(fimK) transcriptional regulator [Type I fimbriae (VF0566)] [Klebsiella pneumoniae subsp. pneumoniae NTUH-K2044]

(fyuA) pesticin/yersiniabactin receptor protein [Yersiniabactin (VF0136)] [Yersinia pestis CO92]

(galF) UTP-glucose-1-phosphate uridylyltransferase subunit GalF [Capsule (VF0560)] [Klebsiella pneumoniae subsp. pneumoniae NTUH-K2044]

(glf) UDP-galactopyranose mutase [LPS (VF0561)] [Klebsiella pneumoniae subsp. pneumoniae NTUH-K2044]

(gmd) GDP-D-mannose dehydratase [Capsule (VF0560)] [Klebsiella pneumoniae subsp. pneumoniae NTUH-K2044]

(gnd) 6-phosphogluconate dehydrogenase [Capsule (VF0560)] [Klebsiella pneumoniae subsp. pneumoniae NTUH-K2044]

(hcp/tssD) type VI secretion system protein Hcp family [T6SS (VF0569)] [Klebsiella pneumoniae subsp. pneumoniae HS11286]

(icmF/tssM) type VI secretion protein TssM [T6SS (VF0569)] [Klebsiella pneumoniae subsp. pneumoniae HS11286]

(iroD) siderophore esterase IroD [Sal (VF0563)] [Klebsiella pneumoniae subsp. pneumoniae NTUH-K2044]

(iroE) siderophore esterase IroE [Sal (VF0563)] [Klebsiella pneumoniae subsp. pneumoniae NTUH-K2044]

(iroN) salmochelin receptor IroN [Sal (VF0563)] [Klebsiella pneumoniae subsp. pneumoniae NTUH-K2044]

(irp1) yersiniabactin biosynthetic protein Irp1 [Yersiniabactin (VF0136)] [Yersinia pestis CO92]

(irp2) yersiniabactin biosynthetic protein Irp2 [Yersiniabactin (VF0136)] [Yersinia pestis CO92]

(iucA) aerobactin Synthetase IucA [Aerobactin (VF0565)] [Klebsiella pneumoniae subsp. pneumoniae NTUH-K2044]

(iucB) N-acetyltransferase IucB [Aerobactin (VF0565)] [Klebsiella pneumoniae subsp. pneumoniae NTUH-K2044]

(iucC) aerobactin siderophore biosynthesis protein IucC [Aerobactin (VF0565)] [Klebsiella pneumoniae subsp. pneumoniae NTUH-K2044]

(iucD) lysine 6-monooxygenase IucD [Aerobactin (VF0565)] [Klebsiella pneumoniae subsp. pneumoniae NTUH-K2044]

(iutA) ferric aerobactin receptor IutA [Aerobactin (VF0565)] [Klebsiella pneumoniae subsp. pneumoniae NTUH-K2044]

(kfoC) glycosyltransferase family 2 protein [LPS (VF0561)] [Klebsiella pneumoniae subsp. pneumoniae NTUH-K2044]

(magA/wzy\_K1) mucoviscosity-associated protein [Capsule (VF0560)] [Klebsiella pneumoniae subsp. pneumoniae NTUH-K2044]

(manB) phosphomannomutase [Capsule (VF0560)] [Klebsiella pneumoniae subsp. pneumoniae NTUH-K2044]

(manC) mannose-1-phosphate guanylyltransferase [Capsule (VF0560)] [Klebsiella pneumoniae subsp. pneumoniae NTUH-K2044]

(mrkA) type 3 fimbrial major pilin subunit MrkA [Type 3 fimbriae (VF0567)] [Klebsiella pneumoniae subsp. pneumoniae NTUH-K2044]

(mrkB) fimbrial chaperone protein mrkB precursor [Type 3 fimbriae (VF0567)] [Klebsiella pneumoniae subsp. pneumoniae NTUH-K2044]

(mrkC) fimbrial biogenesis outer membrane usher protein mrkC precursor [Type 3 fimbriae (VF0567)] [Klebsiella pneumoniae subsp. pneumoniae NTUH-K2044]

(mrkD) fimbrial adhesin protein precursor MrkD [Type 3 fimbriae (VF0567)] [Klebsiella pneumoniae subsp. pneumoniae NTUH-K2044]

(mrkF) type 3 fimbrial minor pilin subunit MrkF [Type 3 fimbriae (VF0567)] [Klebsiella pneumoniae subsp. pneumoniae NTUH-K2044]

(mrkH) transcriptional activator [Type 3 fimbriae (VF0567)] [Klebsiella pneumoniae subsp. pneumoniae NTUH-K2044]

(mrkI) LuxR family regulatory protein [Type 3 fimbriae (VF0567)] [Klebsiella pneumoniae subsp. pneumoniae NTUH-K2044]

(mrkJ) phosphodiesterase [Type 3 fimbriae (VF0567)] [Klebsiella pneumoniae subsp. pneumoniae NTUH-K2044]

(rcsA) transcriptional activator for ctr capsule biosynthesis [RcsAB (VF0571)] [Klebsiella pneumoniae subsp. pneumoniae NTUH-K2044]

(rcsB) transcriptional regulator RcsB [RcsAB (VF0571)] [Klebsiella pneumoniae subsp. pneumoniae NTUH-K2044]

(rmpA) regulator of mucoid phenotype RmpA [RmpA (VF0570)] [Klebsiella pneumoniae subsp. pneumoniae NTUH-K2044]

(sciN/tssJ) type VI secretion system lipoprotein TssJ [T6SS (VF0569)] [Klebsiella pneumoniae subsp. pneumoniae HS11286]

(tssF) type VI secretion system baseplate subunit TssF [T6SS (VF0569)] [Klebsiella pneumoniae subsp. pneumoniae HS11286]

(tssG) type VI secretion system baseplate subunit TssG [T6SS (VF0569)] [Klebsiella pneumoniae subsp. pneumoniae HS11286]

(ugd) UDP-glucose 6-dehydrogenase [Capsule (VF0560)] [Klebsiella pneumoniae subsp. pneumoniae NTUH-K2044]

(vasE/tssK) type VI secretion system baseplate subunit TssK [T6SS (VF0569)] [Klebsiella pneumoniae subsp. pneumoniae HS11286]

(vipA/tssB) type VI secretion system contractile sheath small subunit VipA [T6SS (VF0569)] [Klebsiella pneumoniae subsp. pneumoniae HS11286]

|                                                                                                                                                     |
|-----------------------------------------------------------------------------------------------------------------------------------------------------|
| (vipA/tssB) type VI secretion system contractile sheath small subunit VipA [T6SS (VF0569)] [Klebsiella pneumoniae subsp. pneumoniae HS11286]        |
| (vipB/tssC) type VI secretion system contractile sheath large subunit VipB [T6SS (VF0569)] [Klebsiella pneumoniae subsp. pneumoniae HS11286]        |
| (wbbM) glycosyltransferase [LPS (VF0561)] [Klebsiella pneumoniae subsp. pneumoniae NTUH-K2044]                                                      |
| (wbbN) glycosyltransferase [LPS (VF0561)] [Klebsiella pneumoniae subsp. pneumoniae NTUH-K2044]                                                      |
| (wbbO) glycosyltransferase family 1 protein [LPS (VF0561)] [Klebsiella pneumoniae subsp. pneumoniae NTUH-K2044]                                     |
| (wcaG) GDP-fucose synthetase [Capsule (VF0560)] [Klebsiella pneumoniae subsp. pneumoniae NTUH-K2044]                                                |
| (wcaH) GDP-mannose mannosyl hydrolase [Capsule (VF0560)] [Klebsiella pneumoniae subsp. pneumoniae NTUH-K2044]                                       |
| (wcaI) colanic acid biosynthesis glycosyltransferase WcaI [Capsule (VF0560)] [Klebsiella pneumoniae subsp. pneumoniae NTUH-K2044]                   |
| (wcaJ) undecaprenyl-phosphate glucose phosphotransferase [Capsule (VF0560)] [Klebsiella pneumoniae subsp. pneumoniae NTUH-K2044]                    |
| (wcsT) galactoside O-acetyltransferase [Capsule (VF0560)] [Klebsiella pneumoniae subsp. pneumoniae NTUH-K2044]                                      |
| (wza) capsule polysaccharide export protein precursor [Capsule (VF0560)] [Klebsiella pneumoniae subsp. pneumoniae NTUH-K2044]                       |
| (wzb) protein tyrosine phosphatase [Capsule (VF0560)] [Klebsiella pneumoniae subsp. pneumoniae NTUH-K2044]                                          |
| (wzc) inner membrane tyrosine autokinase [Capsule (VF0560)] [Klebsiella pneumoniae subsp. pneumoniae NTUH-K2044]                                    |
| (wzi) surface assembly of capsule [Capsule (VF0560)] [Klebsiella pneumoniae subsp. pneumoniae NTUH-K2044]                                           |
| (wzm) lipopolysaccharide O-antigen ABC transport system transmembrane component [LPS (VF0561)] [Klebsiella pneumoniae subsp. pneumoniae NTUH-K2044] |
| (wzt) lipopolysaccharide O-antigen ABC transport system ATP-binding component [LPS (VF0561)] [Klebsiella pneumoniae subsp. pneumoniae NTUH-K2044]   |
| (wzx) repeat unit exporter [Capsule (VF0560)] [Klebsiella pneumoniae subsp. pneumoniae NTUH-K2044]                                                  |
| (yagZ/ecpA) E. coli common pilus structural subunit EcpA [ECP (VF0404)] [Escherichia coli O157:H7 str. EDL933]                                      |
| (ybdA) enterobactin exporter EntS [Ent (VF0562)] [Klebsiella pneumoniae subsp. pneumoniae NTUH-K2044]                                               |
| (ybtA) transcriptional regulator YbtA [Yersiniabactin (VF0136)] [Yersinia pestis CO92]                                                              |
| (ybtE) yersiniabactin siderophore biosynthetic protein [Yersiniabactin (VF0136)] [Yersinia pestis CO92]                                             |
| (ybtP) yersiniabactin ABC transporter ATP-binding/permease protein YbtP [Ybt (VF0564)] [Klebsiella pneumoniae subsp. pneumoniae NTUH-K2044]         |
| (ybtQ) yersiniabactin ABC transporter ATP-binding/permease protein YbtQ [Ybt (VF0564)] [Klebsiella pneumoniae subsp. pneumoniae NTUH-K2044]         |
| (ybtS) salicylate synthase Irp9 [Yersiniabactin (VF0136)] [Yersinia pestis CO92]                                                                    |
| (ybtT) type II thioesterase YbtT [Yersiniabactin (VF0136)] [Yersinia pestis CO92]                                                                   |
| (ybtU) yersiniabactin biosynthesis oxidoreductase YbtU [Ybt (VF0564)] [Klebsiella pneumoniae subsp. pneumoniae NTUH-K2044]                          |
| (ybtX) yersiniabactin-associated zinc MFS transporter YbtX [Ybt (VF0564)] [Klebsiella pneumoniae subsp. pneumoniae NTUH-K2044]                      |
