# Supplementary material for: First Report of an Extensively Drug-Resistant ST23 Klebsiella pneumoniae of Capsular Serotype K1 Co-Producing CTX-M-15, OXA-48 and ArmA in Spain
Source: MDPI journal article supplement (doi:10.3390/antibiotics10020157), 2021-02-04
Supplement: s1 [file s1]

| Gene                            | Gaps | Coverage | Identity | Accession |
|---------------------------------|------|----------|----------|-----------|
| <i>aph(3'')-Ib_5</i>            | 0/0  | 100      | 100.0    | AF321551  |
| <i>aph(6)-Id_1</i>              | 0/0  | 100      | 100.0    | M28829    |
| <i>bla</i> <sub>CTX-M-15</sub>  | 0/0  | 100      | 100.0    | AY044436  |
| <i>bla</i> <sub>OXA-48</sub>    | 0/0  | 100      | 100.0    | AY236073  |
| <i>bla</i> <sub>SHV-190_1</sub> | 0/0  | 100      | 99.9     | KP868753  |
| <i>bla</i> <sub>TEM-1B_1</sub>  | 0/0  | 100      | 100.0    | AY458016  |
| <i>dfrA14_5</i>                 | 0/0  | 100      | 99.6     | DQ388123  |
| <i>fosA6_1</i>                  | 0/0  | 97       | 98.3     | KU254579  |
| <i>oqxA_1</i>                   | 0/0  | 100      | 99.2     | EU370913  |
| <i>oqxB_1</i>                   | 0/0  | 100      | 98.8     | EU370913  |
| <i>qnrB1_1</i>                  | 0/0  | 100      | 100.0    | DQ351241  |
| <i>sul1_5</i>                   | 0/0  | 100      | 99.9     | EU780013  |
| <i>sul2_2</i>                   | 0/0  | 100      | 100.0    | AY034138  |

| Product                  |
|--------------------------|
| aph(3'')-Ib_5            |
| aph(6)-Id_1              |
| Alternate name; UOE-1    |
| blaOXA-48_1              |
| blaSHV-190_1             |
| Alternate name; blaTEM-1 |
| dfrA14_5                 |
| fosA6_1                  |
| oqxA_1                   |
| oqxB_1                   |
| qnrB1_1                  |
| sul1_5                   |
| sul2_2                   |
